# Supplementary material for: Genome dynamics and evolution of codon usage patterns in shrimp viruses
Source: Springer Nature journal article supplement (doi:10.1007/s00705-017-3445-7), 2017-06-16
Supplement: MOESM1 [file 12450316]

**Supplementary Table 1**

Nucleotide compositions and codon usages of shrimp viruses.

| Virus | % AT/AU (Mean ± SD) | % GC (Mean ± SD) | % GC3 (Mean ± SD) | ENC (Mean ± SD) |
| --- | --- | --- | --- | --- |
| IMNV | 62.3 ± 2.8 | 37.7 ± 2.8 | 26.4 ± 2.4 | 45.1 ± 2.5 |
| GAV | 53.3 ± 3.4 | 46.7 ± 3.4 | 50.5 ± 8.4 | 49.0 ± 3.1 |
| TSV | 56.9 ± 0.6 | 43.1 ± 0.6 | 37.4 ± 3.5 | 53.7 ± 0.7 |
| YHV | 54.2 ± 2.0 | 45.8 ± 2.0 | 49.6 ± 8.0 | 47.4 ± 1.1 |
| PvNV | 51.4 ± 7.6 | 48.6 ± 7.6 | 40.5 ± 7.4 | 56.0 ± 20.1 |
| HPV | 60.6 ± 2.3 | 39.4 ± 2.3 | 37.0 ± 4.4 | 43.1 ± 3.4 |
| IHHNV | 56.0 ± 1.6 | 44.0 ± 1.6 | 40.6 ± 8.0 | 47.0 ± 4.9 |

**Supplementary Table 2**

RSCU analysis of shrimp viruses and their host, *Penaeus monodon* (Pm)

| AA | Codon |  | RSCU | | | | | |  | AA | Codon |  | RSCU | | | | | |  |
| --- | --- | --- | --- | --- | --- | --- | --- | --- | --- | --- | --- | --- | --- | --- | --- | --- | --- | --- | --- |
| IMNV | TSV | YHV | GAV | PvNV | HPV | IHHNV | Pm | IMNV | TSV | YHV | GAV | PvNV | HPV | IHHNV | Pm |
| Phe | UUU | **1.36** | **1.27** | *0.34* | *0.42* | *0.98* | **1.22** | *0.65* | 0.64 | Ser | UCU | 0.84 | **1.44** | **1.73** | 1.20 | 1.51 | 0.47 | 0.50 | 1.15 |
|  | UUC | *0.64* | *0.73* | **1.66** | **1.58** | **1.02** | *0.78* | **1.35** | **1.36** |  | UCC | *0.32* | 0.89 | 1.19 | 1.14 | 1.06 | *0.12* | 0.92 | **1.37** |
| Leu | UUA | **1.54** | 1.11 | *0.28* | 0.40 | 0.82 | **1.92** | 0.98 | 0.43 |  | UCA | **1.97** | 1.31 | 1.31 | **1.87** | 1.06 | 1.14 | **2.45** | 0.93 |
|  | UUG | 1.17 | **1.93** | 0.32 | *0.34* | 1.28 | 1.60 | *0.71* | 0.93 |  | UCG | 0.39 | 0.64 | *0.28* | *0.39* | *0.25* | 0.36 | *0.24* | 0.59 |
|  | CUU | 1.22 | 0.70 | 1.36 | 1.24 | **1.38** | 0.33 | **1.25** | 1.10 |  | AGU | 1.75 | 1.31 | 0.77 | 0.72 | **1.46** | **2.89** | 1.01 | 0.89 |
|  | CUC | *0.34* | *0.62* | **2.95** | **2.89** | 0.92 | *0.31* | 1.17 | 1.43 |  | AGC | 0.73 | *0.43* | 0.71 | 0.69 | 0.66 | 1.02 | 0.87 | 1.06 |
|  | CUA | 1.15 | 0.89 | 0.72 | 0.63 | 0.82 | 1.31 | 1.09 | 0.47 | Pro | CCU | 0.83 | 1.31 | **1.55** | 1.24 | **1.63** | 0.84 | 0.60 | 1.14 |
|  | CUG | 0.61 | 0.76 | 0.37 | 0.49 | *0.77* | 0.54 | 0.80 | **1.64** |  | CCC | 0.32 | 0.87 | 0.81 | 0.87 | 0.90 | *0.24* | 0.51 | 1.19 |
| Arg | CGU | 1.06 | 0.81 | **1.94** | **1.85** | **1.36** | 0.23 | 0.27 | 1.07 |  | CCA | **2.62** | **1.44** | 1.44 | **1.62** | 1.18 | **2.20** | **2.37** | **1.20** |
|  | CGC | 0.28 | 1.11 | 1.52 | 1.68 | 1.08 | 0.39 | *0.25* | **1.26** |  | CCG | *0.24* | *0.38* | *0.21* | *0.26* | *0.29* | 0.71 | 0.51 | 0.47 |
|  | CGA | 0.65 | 1.15 | 0.77 | 0.54 | 1.19 | 0.19 | 1.18 | 0.74 | Thr | ACU | 1.03 | 1.29 | **1.47** | 0.89 | **1.43** | 0.96 | 0.96 | 1.04 |
|  | CGG | *0.24* | *0.53* | *0.18* | *0.36* | *0.34* | *0.16* | 0.23 | 0.55 |  | ACC | 0.41 | *0.54* | 1.06 | 1.16 | 1.10 | 0.41 | 0.89 | **1.29** |
|  | AGA | **2.92** | **1.43** | 1.25 | 1.01 | 0.79 | **3.46** | **3.08** | 1.12 |  | ACA | **2.38** | **1.34** | 1.30 | **1.77** | 0.86 | **2.42** | **1.61** | 1.02 |
|  | AGG | 0.83 | 0.96 | 0.35 | 0.56 | 1.25 | 1.57 | 0.99 | 1.25 |  | ACG | *0.19* | 0.83 | *0.17* | *0.19* | *0.61* | *0.22* | *0.54* | 0.66 |
| Val | GUU | 1.32 | **1.30** | 1.19 | 1.25 | **1.64** | 0.85 | *0.28* | 0.94 | Ala | GCU | 1.11 | **1.46** | **1.46** | 1.17 | **1.53** | 0.96 | 0.87 | 1.29 |
|  | GUC | *0.45* | *0.59* | **1.87** | **1.89** | 0.74 | *0.32* | 0.88 | 1.05 |  | GCC | 0.41 | 0.71 | 1.23 | 1.19 | 1.12 | *0.44* | 1.20 | **1.36** |
|  | GUA | **1.62** | 0.98 | 0.59 | *0.38* | *0.50* | **2.21** | **1.89** | 0.62 |  | GCA | **2.32** | 1.32 | 1.22 | **1.44** | 0.94 | **2.11** | **1.34** | 0.91 |
|  | GUG | 0.61 | 1.13 | *0.35* | 0.47 | 1.12 | 0.61 | 0.94 | **1.40** |  | GCG | *0.16* | *0.52* | *0.11* | *0.19* | *0.40* | 0.50 | *0.60* | 0.43 |
| Asp | GAU | **1.05** | **1.39** | *0.68* | *0.94* | **1.23** | **1.18** | *0.45* | 0.91 | Glu | GAA | **1.59** | **1.27** | 1.52 | **1.26** | *0.98* | *0.97* | **1.56** | 0.91 |
|  | GAC | *0.95* | *0.61* | **1.32** | **1.06** | *0.77* | *0.82* | **1.55** | **1.09** |  | GAG | *0.41* | *0.73* | *0.48* | *0.74* | **1.02** | **1.03** | *0.44* | **1.09** |
| Ile | AUU | **1.70** | **1.73** | 0.79 | 0.61 | **1.50** | 0.98 | *0.61* | 1.14 | Asn | AAU | **1.20** | **1.23** | *0.73* | *0.76* | **1.33** | *0.97* | *0.66* | 0.80 |
|  | AUC | *0.48* | *0.58* | **2.06** | **2.12** | 1.00 | *0.44* | **1.35** | **1.45** |  | AAC | *0.80* | *0.77* | **1.27** | **1.24** | *0.67* | **1.03** | **1.34** | **1.20** |
|  | AUA | 0.82 | 0.69 | *0.15* | *0.26* | *0.50* | **1.58** | 1.04 | 0.41 | Lys | AAA | **1.36** | *0.71* | **1.09** | *0.94* | *0.92* | *0.54* | **1.29** | 0.63 |
| Tyr | UAU | **1.43** | ***1.38*** | *0.70* | *0.80* | **1.33** | **1.20** | *0.81* | 0.73 |  | AAG | *0.64* | **1.29** | *0.91* | **1.06** | **1.08** | **1.46** | *0.71* | **1.37** |
|  | UAC | *0.57* | *0.62* | **1.30** | **1.20** | *0.67* | *0.80* | **1.19** | **1.27** | Cys | UGU | **1.54** | **1.64** | *0.93* | **1.17** | **1.19** | **1.79** | **1.07** | 0.83 |
| His | CAU | **1.39** | **1.30** | *0.81* | *0.82* | **1.38** | **1.22** | *0.96* | 0.83 |  | UGC | *0.46* | *0.36* | **1.07** | *0.83* | *0.81* | *0.21* | *0.93* | **1.17** |
|  | CAC | *0.61* | *0.70* | **1.19** | **1.18** | *0.62* | *0.78* | **1.04** | **1.17** | Gly | GGU | 1.44 | **1.72** | **1.71** | **1.45** | **1.80** | 1.31 | 0.65 | 1.06 |
| Gln | CAA | **1.35** | *0.82* | *1.15* | **1.08** | **1.03** | *0.80* | **1.39** | 0.61 |  | GGC | *0.43* | 0.69 | 1.31 | 1.33 | 0.73 | 0.34 | 0.58 | **1.34** |
|  | CAG | *0.65* | **1.18** | *0.85* | *0.92* | *0.97* | **1.20** | *0.61* | **1.39** |  | GGA | **1.61** | 1.26 | 0.78 | 0.84 | 0.98 | **2.00** | **2.63** | 1.05 |
|  |  |  |  |  |  |  |  |  |  |  | GGG | *0.52* | *0.34* | *0.20* | *0.38* | *0.49* | *0.35* | *0.14* | 0.56 |

For each synonymous group, most abundant and least abundant codons have been represented in **bold** and *italics*, respectively.

**Supplementary Table 3**

Codon usage preference in viruses and host

| Codon Usage Parameter | | Virus | | | | | | | Host |
| --- | --- | --- | --- | --- | --- | --- | --- | --- | --- |
| **IMNV** | **TSV** | **YHV** | **GAV** | **PvNV** | **HPV** | **IHHNV** | **Pm** |
| Preferred Codons | A/U-ended | 18 | 15 | 9 | 9 | 15 | 14 | 12 | 1 |
| G/C-ended | 0 | 3 | 9 | 9 | 3 | 4 | 6 | 17 |
| Over-represented Codons | A/U-ended | 8 | 3 | 3 | 4 | 3 | 9 | 6 | 0 |
| G/C-ended | 0 | 1 | 4 | 3 | 0 | 1 | 0 | 1 |
| Under-represented Codons | A/U-ended | 0 | 0 | 4 | 5 | 2 | 5 | 4 | 3 |
| G/C-ended | 18 | 9 | 10 | 10 | 5 | 15 | 9 | 5 |

**Supplementary Table 4**

CAI values for virus genes showing codon adaptation towards *P. monodon*

| Virus | Protein Product | CAI | eCAI |
| --- | --- | --- | --- |
| TSV | capsid protein precursor | 0.759 ± 0.002 | 0.739 ± 00.4 |
| YHV | replicase polyprotein 1ab | 0.828 ± 0.001 | 0.775 ± 0.002 |
| nucleocapsid protein | 0.789 ± 0.001 | 0.754 ± 0.003 |
| structural glycoprotein | 0.776 ± 0.001 | 0.745 ± 0.003 |
| GAV | replicase polyprotein pp1ab | 0.825 | 0.774 |
| nucleocapsid protein | 0.803 | 0.763 |
| polyprotein precursor | 0.758 | 0.742 |
| PvNV | RNA-dependent_RNA_polymerase | 0.769 | 0.756 |
| capsid protein | 0.779 | 0.731 |
| HPV | nonstructural protein 1 | 0.755 ± 0.013 | 0.748 ± 0.005 |
| nonstructural protein 2 | 0.780 ± 0.004 | 0.772 ± 0.006 |
| IHHNV | nonstructural protein 1 | 0.776 ± 0.006 | 0.756 ± 0.002 |

**Supplementary Table 5**

Relative dinucleotide abundance in shrimp viruses

| Dinucleotide | IMNV | TSV | YHV | GAV | PvNV | HPV | IHHNV | PmNV | WSSV |
| --- | --- | --- | --- | --- | --- | --- | --- | --- | --- |
| ApA | 1.049 | 0.952 | 0.926 | 0.895 | 1.155 | 0.772 | 0.871 | 0.954 | 1.095 |
| ApC | 1.087 | 0.989 | 1.048 | 1.067 | 0.950 | 1.177 | **1.276** | 0.952 | 0.929 |
| ApG | 0.856 | 0.993 | 0.987 | 0.884 | 0.878 | 1.200 | 1.053 | 0.968 | 1.006 |
| ApU | 0.911 | 1.089 | 1.030 | 1.132 | 0.905 | 1.029 | 0.999 | 1.090 | 0.916 |
| CpA | **1.381** | 1.255 | 1.303 | **1.352** | 1.110 | **1.390** | 1.047 | 1.101 | 1.062 |
| CpC | 0.922 | 1.053 | *0.685* | 0.723 | 1.081 | 0.976 | 0.961 | 1.082 | 1.130 |
| CpG | *0.608* | *0.753* | 0.862 | 0.880 | 0.852 | *0.488* | 0.605 | *0.725* | *0.628* |
| CpU | 0.867 | 0.820 | 1.147 | 1.017 | 0.976 | 0.750 | 1.225 | 0.997 | 1.114 |
| GpA | 1.005 | 1.071 | 1.079 | 1.068 | 1.019 | 1.161 | 1.265 | 1.174 | 1.154 |
| GpC | 0.965 | 1.074 | 0.900 | 0.897 | 0.909 | 0.998 | *0.557* | 0.980 | 0.888 |
| GpG | 1.080 | 0.851 | 1.003 | 1.082 | 1.077 | 0.864 | 1.263 | 0.929 | 1.051 |
| GpU | 1.008 | 0.969 | 0.975 | 1.024 | 1.006 | 0.930 | 0.739 | 0.860 | 0.881 |
| UpA | 0.713 | 0.775 | 0.687 | *0.647* | *0.820* | 0.935 | 0.746 | 0.890 | 0.717 |
| UpC | 0.911 | 1.008 | **1.341** | 1.306 | 1.046 | 0.931 | 1.146 | 1.031 | 1.109 |
| UpG | 1.380 | **1.333** | 1.221 | 1.180 | **1.161** | 1.123 | 1.131 | **1.230** | **1.207** |
| UpU | 1.200 | 1.006 | 0.814 | 0.868 | 1.055 | 1.107 | 1.093 | 0.981 | 1.107 |

For each virus, most abundant and least abundant dinucleotides have been represented in **bold** and *italics*, respectively.
